# Supplementary material for: Improving medication dispensing and counselling for patients with vision impairment: a qualitative study of pharmacist-reported barriers and facilitators
Source: Springer Nature journal article supplement (doi:10.1186/s12913-024-11009-9), 2024-04-26
Supplement: MOESM1 [file 27022456]

## Additional File 1: COREQ checklist

| No. Item                                           | Guide questions/description                                                                                                                              | Comments                                                                                                                                     |
|----------------------------------------------------|----------------------------------------------------------------------------------------------------------------------------------------------------------|----------------------------------------------------------------------------------------------------------------------------------------------|
| <b>Domain 1: Research team and reflexivity</b>     |                                                                                                                                                          |                                                                                                                                              |
| <i>Personal Characteristics</i>                    |                                                                                                                                                          |                                                                                                                                              |
| <b>1. Inter viewer/facilitator</b>                 | Which author/s conducted the interview or focus group?                                                                                                   | One researcher (BK) conducted all interviews.                                                                                                |
| <b>2. Credentials</b>                              | What were the researcher's credentials? e.g. PhD, MD                                                                                                     | BK had a BSc. in Pharmaceutical Sciences and MSc. in Clinical Pharmacy and was a PhD student at the time of the study.                       |
| <b>3. Occupation</b>                               | What was their occupation at the time of the study?                                                                                                      | BK was a lecturer at the College of Pharmacy, King Saud University and a PhD student at Queen's University Belfast.                          |
| <b>4. Gender</b>                                   | Was the researcher male or female?                                                                                                                       | Female.                                                                                                                                      |
| <b>5. Experience and training</b>                  | What experience or training did the researcher have?                                                                                                     | BK had undertaken training in qualitative research methodologies.                                                                            |
| <i>Relationship with participants</i>              |                                                                                                                                                          |                                                                                                                                              |
| <b>6. Relationship established</b>                 | Was a relationship established prior to study commencement?                                                                                              | No prior relationship was established prior to the contact about the study.                                                                  |
| <b>7. Participant knowledge of the interviewer</b> | What did the participants know about the researcher? e.g. personal goals, reasons for doing the research                                                 | Participants were aware that BK was a lecturer and a PhD student and were briefed on the purpose of the study.                               |
| <b>8. Interviewer characteristics</b>              | What characteristics were reported about the interviewer/facilitator? e.g. Bias, assumptions, reasons and interests in the research topic                | BK had an interest in the research topic.                                                                                                    |
| <b>Domain 2: Study design</b>                      |                                                                                                                                                          |                                                                                                                                              |
| <i>Theoretical framework</i>                       |                                                                                                                                                          |                                                                                                                                              |
| <b>9. Methodological orientation and Theory</b>    | What methodological orientation was stated to underpin the study? e.g. grounded theory, discourse analysis, ethnography, phenomenology, content analysis | The Theoretical Domains Framework underpinned the development of the study. Framework analysis was carried out followed by content analysis. |
| <i>Participant selection</i>                       |                                                                                                                                                          |                                                                                                                                              |
| <b>10. Sampling</b>                                | How were participants selected? e.g. purposive, convenience, consecutive, snowball                                                                       | Purposive and snowball sampling were utilised.                                                                                               |
| <b>11. Method of approach</b>                      | How were participants approached? e.g. face-to-face, telephone, mail, email                                                                              | Participants were contacted via telephone or email followed by a formal invitation letter through email or WhatsApp messages.                |
| <b>12. Sample size</b>                             | How many participants were in the study?                                                                                                                 | 26 pharmacists                                                                                                                               |
| <b>13. Non-participation</b>                       | How many people refused to participate or dropped out? Reasons?                                                                                          | All pharmacist who were approached after meeting the inclusion criteria completed the study.                                                 |

| No. Item                               | Guide questions/description                                                                                                        | Comments                                                                                                                                                      |
|----------------------------------------|------------------------------------------------------------------------------------------------------------------------------------|---------------------------------------------------------------------------------------------------------------------------------------------------------------|
| <b>Setting</b>                         |                                                                                                                                    |                                                                                                                                                               |
| 14. Setting of data collection         | Where was the data collected? e.g. home, clinic, workplace                                                                         | Pharmacists were interviewed at their place of work or over the telephone.                                                                                    |
| 15. Presence of non-participants       | Was anyone else present besides the participants and researchers?                                                                  | No                                                                                                                                                            |
| 16. Description of sample              | What are the important characteristics of the sample? e.g. demographic data, date                                                  | Participants were pharmacists from different pharmacy practice areas (community, hospital, clinical, managerial). Eighteen were males and eight were females. |
| <b>Data collection</b>                 |                                                                                                                                    |                                                                                                                                                               |
| 17. Interview guide                    | Were questions, prompts, guides provided by the authors? Was it pilot tested?                                                      | A topic guide with prompts was developed and used during the semi-structured interviews. The topic guide was piloted with three pharmacists.                  |
| 18. Repeat interviews                  | Were repeat inter views carried out? If yes, how many?                                                                             | No repeat interviews were required.                                                                                                                           |
| 19. Audio/visual recording             | Did the research use audio or visual recording to collect the data?                                                                | Interviews were audio-recorded.                                                                                                                               |
| 20. Field notes                        | Were field notes made during and/or after the inter view or focus group?                                                           | BK recorded field notes during and after the interviews.                                                                                                      |
| 21. Duration                           | What was the duration of the inter views or focus group?                                                                           | Interviews' duration ranged from 39 minutes to two hours and 20 minutes.                                                                                      |
| 22. Data saturation                    | Was data saturation discussed?                                                                                                     | Data saturation was achieved at interview number 26.                                                                                                          |
| 23. Transcripts returned               | Were transcripts returned to participants for comment and/or correction?                                                           | Transcripts were not returned to participants.                                                                                                                |
| <b>Domain 3: Analysis and findings</b> |                                                                                                                                    |                                                                                                                                                               |
| <b>Data analysis</b>                   |                                                                                                                                    |                                                                                                                                                               |
| 24. Number of data coders              | How many data coders coded the data?                                                                                               | Two researchers (BK and CH or HB) coded three interviews initially and then BK coded the remainder of the interviews.                                         |
| 25. Description of the coding tree     | Did authors provide a description of the coding tree?                                                                              | Data was reported under the TDF domains and barriers/ facilitators were identified under each domain.                                                         |
| 26. Derivation of themes               | Were themes identified in advance or derived from the data?                                                                        | TDF domains represented the main themes under which barrier/facilitators were identified from the data.                                                       |
| 27. Software                           | What software, if applicable, was used to manage the data?                                                                         | NVivo® QSR 12                                                                                                                                                 |
| 28. Participant checking               | Did participants provide feedback on the findings?                                                                                 | Future publications will be made accessible to participants.                                                                                                  |
| <b>Reporting</b>                       |                                                                                                                                    |                                                                                                                                                               |
| 29. Quotations presented               | Were participant quotations presented to illustrate the themes/findings?<br>Was each quotation identified? e.g. participant number | Quotations were presented within the results section with participants given an anonymous code (e.g. CP04, HP13).                                             |
| 30. Data and findings consistent       | Was there consistency between the data presented and the findings?                                                                 | See results and discussion sections. Efforts were taken to present data in a clear and consistent manner highlighting where differences were identified.      |
| 31. Clarity of major themes            | Were major themes clearly presented in the findings?                                                                               |                                                                                                                                                               |
| 32. Clarity of minor themes            | Is there a description of diverse cases or discussion of minor themes?                                                             |                                                                                                                                                               |
